1 **Chromosome splitting of *Plasmodium berghei* using the**  
2 **CRISPR/Cas9 system.**

3

4 Daniel Addo-Gyan<sup>1¶</sup>, Haruka Matsushita<sup>1¶</sup>, Enya Sora<sup>1</sup>, Tsubasa Nishi<sup>2</sup>, Masao Yuda<sup>2</sup>, Naoaki

5 Shinzawa<sup>1</sup>, and Shiroh Iwanaga<sup>3, 4\*</sup>

6 <sup>1</sup> Department of Environmental Parasitology, Graduate School of Medical and Dental Sciences,

7 Tokyo Medical and Dental University, Bunkyo-ku , Tokyo, Japan.

8 <sup>2</sup>Laboratory of Medical Zoology, Department of Medicine, Mie University, Kurimamachi

9 Yacho, Tsu, Mie, Japan

10 <sup>3</sup> Department of Molecular Protozoology, Research Institute for Microbial Diseases, Osaka

11 University, Yamadaoka, Suita, Osaka, Japan.

12 <sup>4</sup> Center for Infectious Disease Education and Research (CIDER), Osaka University, Yamadaoka,

13 Suita, Osaka, Japan.

14

15 \*Corresponding author

16 Email: [iwanaga@biken.osaka-u.ac.jp](mailto:iwanaga@biken.osaka-u.ac.jp) (S.I)

17

18 ¶ These authors contributed equally to this work

19

## 20 **ABSTRACT**

21 Spatial arrangement of chromosomes is responsible for gene expression in *Plasmodium*  
22 parasites. However, methods for rearranging chromosomes have not been established, which  
23 makes it difficult to investigate its role in detail. Here, we report a method for splitting  
24 chromosome in rodent malaria parasite by CRISPR/Cas9 system using fragments in which a  
25 telomere and a centromere were incorporated. The resultant split chromosomes segregated  
26 accurately into daughter parasites by the centromere. In addition, elongation of *de novo* telomeres  
27 were observed, indicating its proper function. Furthermore, chromosome splitting had no effect  
28 on development of parasites. Splitting of the chromosome is expected to alter its spatial  
29 arrangement, and our method will thus be useful for investigating its biological role related with  
30 gene expression.

31

32 Key words: Malaria, Chromosome splitting, spatial arrangement of chromosomes and  
33 CRISPR/Cas9 system.

34

35

## 36 INTRODUCTION

37 *Plasmodium* parasites, which are causative agents of malaria, possess a complex life cycle  
38 consisting of distinctive developmental stages between mosquitos and animals. Each  
39 developmental stage is controlled by the stage-specific gene regulation, for which sequence-  
40 specific transcription factors[1] and epigenetic regulators are responsible[2,3]. In addition to these,  
41 the spatial arrangement of chromosomes in the nucleus is considered recently to participate in the  
42 regulation of gene expression in parasites. For instance, chromosome conformation capture  
43 analysis using next-generation sequencing (Hi-C) has shown that heterochromatic regions  
44 scattered throughout chromosomes form a cluster at the periphery of the nucleus, which are  
45 known as a repressive center[4,5]. Dissociation from the repressive center will change the  
46 chromatin state from heterochromatin to euchromatin, which triggers activation of  
47 transcription[6,7]. Since multi-gene families of infected red blood cell (RBC)-surface antigens  
48 and the sex-specific transcription factor are located in these heterochromatic regions[8], their  
49 dissociation may be responsible for antigenic variation and sexual development. Furthermore, the  
50 three-dimensional size and volume of chromosomes change during the progression of asexual  
51 development in RBC, which may be responsible for the changes in transcriptional activity[4]. To  
52 investigate the biological role of the spatial arrangement of chromosomes in gene expression,  
53 engineering large genomic regions is required. However, there are no established methods in  
54 *Plasmodium* parasites at present.

55 The CRISPR/Cas9 system is a useful technique for engineering the genes of *Plasmodium* pa-  
56 rasites[9]. In this system, a gene is modified through two steps as follows: the targeted genomic  
57 locus cleavage by the Cas9-single guide RNA (sgRNA) complex, and the induced double-strand  
58 break repair by homology-directed recombination (HDR) using donor template DNA. In our  
59 previous study, we generated the Cas9-expressing rodent malaria parasite (*P. berghei*), that  
60 successfully engineered the genes with high efficiency, by transfecting these parasites with linear

61 donor template DNA, and the plasmid encoding sgRNA[10]. With this system, we were able to  
62 remove more than 50 kbp of the subtelomere region of chromosome 1[10]. Briefly, we cleaved  
63 the border of the subtelomere and non-telomeric chromosomal region on chromosome 1, followed  
64 by HDR providing the telomeric sequence at the cleaved end of the chromosome. The newly  
65 generated telomere functioned properly, which ensured the replication of the *de novo*  
66 chromosome end. The resultant transgenic parasites that carries the truncated chromosome 1 had  
67 no growth defects during both asexual and sexual development in RBC. This truncation of the  
68 chromosome suggests that the large-scale editing of chromosomes could be achieved by the  
69 CRISPR/Cas9 system.

70 In this study, we developed a method for splitting the chromosome using the CRISPR/Cas9  
71 system. In addition to a telomere, we used a centromere which is responsible for chromosome  
72 segregation into daughter cells during nuclear division. After confirming the split of the  
73 chromosome, its effect on the development of the parasites was examined. Furthermore, to test  
74 the versatility of this method, we attempted to cleave the chromosome at different loci. Our  
75 method enables us to split chromosomes in a flexible manner, which allows for a variety of future  
76 applications including large-scale genome editing.

77

## 78 **MATERIALS AND METHODS**

### 79 **Animal experiments.**

80 All animal experiments were carried-out in accordance with the guidelines for the care and  
81 use of laboratory animals, approved by the animal experimentation committee of the Tokyo  
82 Medical and Dental University.

83

84

85

## 86 **Construction of plasmid having the guide RNAs.**

87 A 19-bp sequence of guide RNA (gRNA) was designed upstream of the protospacer-adjacent  
88 motif (PAM), and a pair of complementary oligonucleotides was synthesized for each target site.  
89 The gRNA was transcribed by Pfu6 (U6 spliceosomal RNA, PF3D7\_1341100) promoter. Since  
90 the Pfu6 promoter requires a guanosine nucleotide to initiate transcription, a guanosine was added  
91 at the 5' end of the designed oligonucleotide that encoded the sense sequence. In addition, the  
92 oligonucleotides were designed to generate overhangs to be used for cloning into *BsmBI*-digested  
93 psgRNA1 plasmid[10]. The cloned gRNA was placed under Pfu6 promoter and fused with a  
94 tracrRNA, which generated an sgRNA. The psgRNA1 plasmid has human dihydroreductase gene  
95 as drug selectable marker. Thus, the transfected parasite with this plasmid can be screened using  
96 pyrimethamine. The designed oligonucleotides were shown in S1 Table.

97

## 98 **Preparation of linear donor templates with telomere and** 99 **centromere.**

100 The DNA fragment used for HDR was amplified by PCR using primer set (S1 Table) and then  
101 cloned upstream of telomere sequence of pArm\_L plasmid (S2 Fig). The cloned DNA fragment  
102 was excised together with the telomere sequence by restriction digestion of 10  $\mu$ g of resultant  
103 plasmid with *SalI* and *PmeI*. This linear DNA fragment was used for HDR with the centric  
104 chromosome after cleavage by the Cas9-sgRNA complex. Another DNA fragment, which was  
105 used for HDR with the acentric chromosome, was amplified and cloned upstream of both telomere  
106 and centromere of pArm\_R plasmid (S2 Fig). The linear DNA fragment with the centromere and  
107 telomere was excised from the resultant plasmid by digestion with *SalI* and *PmeI*, and used for  
108 the transfection experiment.

109

110

## 111 **Transfection of parasites.**

112 Transfection of parasites had been described previously[11]. Briefly, two linear forms of DNA  
113 fragments that had a telomere only, and both telomere and centromere were co-introduced with  
114 the psgRNA1 plasmid having the sgRNA, into purified schizonts ( $1 \times 10^7$  parasites) of *P. berghei*  
115 ANKA using the parasite nucleofector II kit and the Nucleofector II device with the U-033  
116 program (Lonza). Transfected parasites were injected intravenously into 5 - 7 weeks old female  
117 ddY mice, immediately after electroporation. Treatment with pyrimethamine was initiated 30  
118 hours post- infection and continued for 5 days, followed by withdrawal of the drug. Transfection  
119 experiments for generating transgenic parasites were carried out independently in duplicate. The  
120 clonal transgenic parasite lines were obtained by limiting dilution procedure.

121

## 122 **Contour-Clamped Homogenous Electric Field (CHEF)** 123 **electrophoresis analysis.**

124 Whole blood from mice inoculated with transgenic parasites were used to make DNA agarose  
125 plugs (at approximately  $1.0 \times 10^8$  parasites / plug) as described in a previous study[12].  
126 Chromosomes were separated on a 1% pulse-field certified agarose gel on the CHEF Mapper XA  
127 system (Bio-Rad) under the following conditions: 0.5 x TBE buffer, temperature: 14 °C, switch  
128 time: 10-80 sec, runtime: 20 hours, included angle: 120°, voltage gradient: 6 V/cm.

129

## 130 **Southern hybridization analysis**

131 Whole blood from mice inoculated with transgenic parasites was filtered through the cellulose  
132 powder D columns (Advantec, #49020040) to remove leucocytes. The RBCs were collected by  
133 centrifugation and lysed with a lysis buffer (1.5 M  $\text{NH}_4\text{Cl}$ , 0.1 M  $\text{KHCO}_3$ , and 0.01 M EDTA) to

134 obtain the parasites. The genomic DNA was purified from the obtained parasites as described  
135 previously[12]. The genomic DNA purified from split-Ch1-L and split-Ch1-S parasites were  
136 digested with *EcoRI*, followed by blotting onto a nylon membrane. The probe DNA was labelled  
137 with DIG according to the manufacturer's instructions (Roche Diagnostics GmbH) and used for  
138 hybridization with genomic DNA blotted on the membrane. Signals derived from hybridized  
139 DNA was detected using the Chemidoc MP system (Bio-rad).

140 Chromosomes separated by CHEF electrophoresis were transferred onto a nylon membrane  
141 and hybridized with probes specific for PBANKA0112500 and PBANKA\_0104900. Subsequent  
142 Southern hybridizations were performed in a similar manner as described above.

143

## 144 **Evaluation of asexual multiplication and merozoite formation.**

145 Asexual multiplication in RBCs was evaluated by monitoring parasitemia in infected mice. The  
146 1,000 iRBCs were injected intravenously into naive mice and the progress of the parasitemia was  
147 examined every 12 hours using a Giemsa-stained thin blood smear. All experiments were  
148 performed in triplicates. Averages of parasitemia between split-Ch1-S and parental pbcas9  
149 parasites were compared using a *t*-test. The growth rate was calculated based on the approximate  
150 growth curve. The curve was represented by the following equation;

$$151 \quad P = Ae^{xD} \quad (1)$$

152 Where P is the parasitemia; A is the constant value; D is the day post-infection; and  $e^x$  is the  
153 growth rate.

154 The mice were inoculated with split-Ch1-S intra-peritoneally. At a parasitemia of 2 - 3%,  
155 whole blood taken by cardiac puncture was washed once with 20 ml RPMI medium containing  
156 20% fetal calf serum (FCS). The infected RBCs were cultured with 25 ml of culture medium  
157 (RPMI 1640, 20% FCS, 500  $\mu$ L penicillin-streptomycin) under low oxygen conditions: 5%

158 oxygen, 5% carbon dioxide, 90% nitrogen at 37 °C for 16 hours. Giemsa-stained thin smears were  
159 prepared and the number of merozoites per mature schizont was counted for 100 schizonts.

## 160 **Evaluation of exflagellation and ookinete formation.**

161 Exflagellation of male gametes was assessed by counting the number of exflagellation centres.  
162 Mice were pre-treated with an intraperitoneal injection of 0.2 ml phenylhydrazine (6 mg/ml in  
163 PBS) 3 days prior to parasite infection to stimulate reticulocyte formation.  $1 \times 10^5$  iRBCs were  
164 intravenously inoculated into the phenylhydrazine-treated mice. At 5 days post-infection, infected  
165 blood was collected from the tail vein and diluted twenty-fold with ookinete culture medium  
166 (RPMI1640 containing 100  $\mu$ M xanthurenic acid, 50 mg/l hypoxanthine, 25 mM HEPES, 24 mM  
167  $\text{NaHCO}_3$ , 50 U/ml penicillin, 50  $\mu$ g/ml streptomycin, and 20% FCS, adjusted to pH 7.5). The  
168 number of exflagellation centres per 10,000 RBC was counted using Burker-Turk counting  
169 chambers after incubation at 20°C for 10 min.

170 Ookinete formation was evaluated as previously described[13]. Briefly, mice were pre-treated  
171 with phenylhydrazine and infected as in the exflagellation assay described above. At 5 days post-  
172 infection, infected blood was collected from mice, and leukocytes were removed using cellulose  
173 powder D columns. Leukapheresis blood was diluted 10-fold with ookinete culture medium.  
174 Diluted blood samples were incubated at 20°C for 22-24 h. Giemsa-stained thin smears were  
175 prepared and assessed for ookinetes. The number of mature and immature ookinetes were counted,  
176 and the mature ookinete rate was calculated as follows:

177

$$178 \text{ Mature ookinete rate} = \left( \frac{\text{number of mature ookinetes}}{\text{Number of mature ookinetes} + \text{number of immature ookinetes}} \right) \times 100 \quad (2)$$

179

180

181

182



183

184

## 185 **RESULTS**

### 186 **Splitting chromosome 1 of *Plasmodium berghei*.**

187 In this study, we selected chromosome 1 as a target for proving the experimental concept of  
188 chromosome splitting. The chromosome 1 of *P. berghei* consists of 515,659bp and 136 genes.  
189 The centromere of this chromosome is located at 389,413 - 390,757, and the sub-telomeres are  
190 located within less than 50 kbp from both ends (<https://plasmodb.org/>). To split the chromosome,  
191 we utilized the CRISPR/Cas9 system using the donor template DNAs in which telomere and a  
192 centromere sequences were incorporated. The telomeres of *P. berghei* are composed of a  
193 repetition of a degenerated motif (5'-GGGTTYA, where Y is T or C)[14], and the centromeres of  
194 this parasite are highly A/T rich sequences and are the smallest regional centromeres, of which  
195 sizes range from 1.5 to 3.0 kb. In this study, the centromere from chromosome 5 was used.  
196 Splitting of the chromosome was carried out by two steps as follows: specific cleavage of the  
197 chromosome by the Cas9-sgRNA complex and integration of the telomere and centromere at the  
198 cleaved ends of chromosome by HDR (Fig 1). When the chromosome was cleaved, centric and  
199 acentric chromosome fragments were produced. The ends of both those centric and acentric  
200 chromosomes would be protected by the introduced telomere. The centric chromosome would  
201 segregate accurately into daughter cells, but the acentric chromosome would not, due to the lack  
202 of centromere (Fig. 1). Thus, to make acentric chromosome segregate, the addition of centromere  
203 would be necessary.

204

205 **Fig 1. Experimental scheme of chromosome splitting** (A) pbcas9 is the transgenic parasite  
206 expressing the Cas9 nuclease in the nucleus. (B) Chromosome 1 is cleaved by the Cas9, which  
207 generates a centric fragment and an acentric fragment. The white circle is the original centromere.

208 (C) The cleaved end of the centric chromosome fragment is repaired by homologous  
209 recombination using the donor DNA with a telomere sequence (blue triangle). While, that of the  
210 acentric chromosome fragment is repaired using the donor template with both a centromere (red  
211 circle) and telomere (blue triangle). The split chromosomes will be maintained in the parasite due  
212 to the centromere and telomere. (D and E) In contrast, if the cleaved end of the acentric  
213 chromosome fragment is repaired using the donor template with only a telomere, the parasite will  
214 lose the split chromosome due to the failure of its segregation. As a result, the parasite will die  
215 due to this loss of a chromosome.

216

217 We selected PBANKA\_0111600, which encodes a rhoptry protein (ROP14) as a target for the  
218 cleavage site (Fig 2A). The ROP14 which is located at 444,999 - 448,675 of chromosome 1, and  
219 since it is not essential for asexual development in RBC, it can be disrupted without deleterious  
220 effects in this developmental stage[15]. The sgRNA plasmid specific for *rop14* and the two linear  
221 donor templates were co-introduced into the pbcas9 parasite, in which *cas9* of *Streptococcus*  
222 *pyogenes* was integrated at the *cssu* locus (Fig 2A)[10]. Parasites emerged in peripheral blood 2  
223 days after removal of drug selective pressure, and subsequent genotyping analysis by PCR  
224 indicated the presence of the transgenic parasites with split chromosomes, while there was also  
225 the wild-type parasites present. The parasite line with split chromosomes were further cloned by  
226 limiting dilution and named as split-Ch1-S. The genotyping analysis of split-Ch1-S parasite  
227 indicated the splitting of chr1 (Fig 2B).

228

229 **Fig 2. CRISPR/Cas9-based chromosome split.** (A) The PBANKA\_0111600 was cleaved by the  
230 Cas9-sgRNA complex, followed by HDR with the donor template DNA including only telomere,  
231 and telomere and centromere. (B) The genotyping PCR was performed using the sets of primers  
232 indicated at the bottom. (C) Southern hybridization analyses of the transgenic parasites, which  
233 are split-Ch1-S and -L, detected the split chromosomes. The probe DNA used in each analysis is

234 shown at the bottom. The information about the probe are described in S3 Fig and S4 Fig. (D)  
235 Southern hybridization shows the telomere extension in the transgenic parasite.

236

237 To confirm the split of chromosome 1, we performed CHEF-electrophoresis of split-Ch1-S,  
238 followed by Southern hybridization using probes specific to each split chromosome fragment:  
239 two DNA probes were derived from PBANKA\_0104900 and PBANKA\_0112500, which are  
240 located on the left and the right chromosome fragments, respectively (Fig 2C and S3A Fig). The  
241 signals of both left and right chromosome fragments were detected at the expected sizes of  
242 approximately 450 kbp and 60 kbp, respectively (Fig 2C). Similar results were obtained from  
243 another biologically independent split-Ch1-S parasite. These results demonstrate that  
244 chromosome could be divided by CRISPR/Cas9 system using telomere and centromere sequences.

245 In the previous study, when a telomere sequence was added to the end of cleaved chromosome,  
246 *de novo* elongation of the telomere occurred[10]. To investigate whether a similar elongation  
247 would be observed in this study, we performed Southern hybridization analysis of the telomere  
248 end of the split chromosome. The signal derived from the right chromosome fragment was  
249 detected at approximately 1.3 kbp, when the digested genomic DNA of split-Ch1-S was  
250 hybridized with the probe DNA from the proximal region of the additional telomere (Fig 2D and  
251 S3B Fig). On the other hand, in the negative control using the linear donor template, a signal was  
252 detected at 0.8 kbp (Fig 2D and S3B Fig). This size difference between those two signals indicated  
253 the *de novo* elongation of the telomere at the end of split chromosome. In addition, the signal is  
254 broad, and its width is maintained within about 0.4 kbp, suggesting that *de novo* telomere  
255 extension is regulated within a certain length. These results suggested that the introduced telomere  
256 sequence was recognized by telomerase in split-Ch1-S like the original telomere, allowing for the  
257 stable maintenance of the split chromosome in the parasites.

258 To examine the versatility of this method, we split chromosome 1 at another genomic locus,  
259 where PBANKA\_0105300 was located (S4A Fig). The PBANKA\_0105300 is located at 216,483

260 - 221,962 of chromosome 1, encodes the unknown-function *Plasmodium* protein and is not  
261 essential for asexual development in RBCs[15]. Transfection experiments using the plasmid  
262 having the sgRNA and two linear donor templates were performed, and the clonal transgenic  
263 parasite obtained by the limiting dilution was named split-Ch1-L (S4B Fig). The genotyping and  
264 Southern hybridization analyses of split-Ch1-L demonstrated the splitting of chromosome 1: PCR  
265 products specific for the split left and right chromosome fragments were amplified (S4C Fig). In  
266 addition, the signals derived from those two fragments were detected at expected sizes, which  
267 were approximately 365 kbp and 225 kbp (Fig 2C). Furthermore, the elongation of the *de novo*  
268 telomere was confirmed by Southern analysis (S4D Fig and S4E Fig). These results showed that  
269 any genomic locus of interest could be split using this method.

270

## 271 **Effect of splitting the chromosome on the development of** 272 **parasites.**

273 *Plasmodium* parasites undergo atypical mitotic division during asexual multiplication in  
274 RBCs, whereby a multinucleate syncytium, schizont, is formed. All 14 chromosomes segregate  
275 accurately into those divided nuclei in schizonts, followed by the formation of RBC-invasive  
276 merozoite. As a result of splitting the chromosome, the total number of chromosomes became 15,  
277 which might have some influence on mitotic division. To examine this, we compared the asexual  
278 multiplication of split-Ch1-S parasite to that of pbcas9. The result clearly showed comparable  
279 growth of both parasite lines in RBCs. The growth rates of split-Ch1-S and pbcas9 were estimated  
280 as 5.6 and 6.4, respectively, indicating that there was no significant defect of asexual  
281 multiplication in split-Ch1-S (Fig 3A). Moreover, split-Ch1-S formed a comparable number of  
282 nuclei in schizonts alongside pbcas9, and no defects in their ring forms and trophozoites other  
283 than schizonts were observed (Fig 3B and C). Taken together, these results showed that an  
284 increase in chromosome number due to splitting did not affect mitotic division of the parasites,

285 and that the parasite was able to multiply asexually in RBCs without any defects, despite its  
286 chromosome being split.

287 **Fig 3. Asexual development of the split-Ch1-S parasites.** (A) The growth of the split-Ch1-S  
288 parasites, which is indicated by the blue line, was comparable to that of the parental pbcas9  
289 parasites, which is shown by the black line. The points and error bars represent the mean and  
290 standard error of the mean of triplicate values. Distributions for each day were compared using  
291 the unpaired *t*-test (not significant). (B) The morphologies of the parasites during asexual  
292 development were similar between pbcas9 (upper) and split-Ch1-S (lower). The bar indicates 5  
293  $\mu\text{m}$ . (C) The number of merozoites per schizonts of the split-Ch1-S parasite was comparable to  
294 that of the parental pbcas9 strain. The middle line, top, and bottom of the box, top and bottom  
295 whiskers are the median, 75th and 25th percentiles, and the maximum and minimum values  
296 respectively. Distributions were compared using the unpaired *t*-test (not significant).

297

298 We next examined whether splitting the chromosome affects sexual development and  
299 fertilization. It is known that some part of the parasites undergoes sexual commitment during  
300 asexual development in RBCs, then develop into female and male gametocytes. These  
301 gametocytes fertilize in the midgut of *Anopheles* mosquitos after blood feeding and develop into  
302 zygotes, followed by the formation of ookinetes which is a midgut invasive form. Meiosis occurs  
303 in zygotes, and the parasites then return to haploid from diploid[16]. Here, we observed both  
304 female and male gametocytes of split-Ch1-S in peripheral blood. In addition, exflagellation of  
305 male gametes was induced by xanthurenic acid, and the number of exflagellation centres of split-  
306 Ch1-S were comparable to that of pbcas9 (Fig 4A). A comparison of the morphologies of the  
307 ookinetes in giemsa-stain smears for both split-Ch1-S and pbcas9 parasites showed no significant  
308 difference (Fig 4B), suggesting not only normal ookinete formation, but also zygote development.  
309 Furthermore, the average of mature ookinete rates was comparable in split-Ch1-S (86.4 %) to the  
310 pbcas9 parasites (85.0%) (Fig 4C). These results suggested that splitting the chromosome did not

311 interfere with asexual multiplication, sexual development, fertilization, and ookinete formation  
312 including meiosis.

313

314 **Fig 4. Sexual development of the split-Ch1-S parasites.** (A) The number of exflagellation  
315 centers of split-Ch1-S parasites were comparable to that of pbcas9 parasites. The column and  
316 error bars indicate the mean and standard error from biological triplicates. (B and C) Ookinete  
317 shape and conversion rate were normal in the split-Ch1-S parasites. The columns and error bars  
318 indicate the mean and standard error of the mean from biological triplicates. Distributions in A  
319 and C were compared using the unpaired *t*-test (not significant). The bar indicates 5  $\mu$ m.

320

## 321 **DISCUSSION**

322 Elucidating the mechanism of the regulation of gene expression is essential for  
323 understanding parasite's complex life cycle. Recent advanced analysis, such as Hi-C analysis  
324 suggests that, in addition to sequence-specific transcriptional factors and epigenetic regulators,  
325 the spatial arrangement of chromosomes is involved in the regulation of gene expression[4,5] It  
326 is possible that this spatial arrangement is altered by chromosome splitting using our method,  
327 which may cause a gene expression and epigenetic state change: since telomere ends are  
328 invariably anchored to inner nuclear membrane[17], the *de novo* telomere generated as a result of  
329 splitting chromosome may be also tethered to inner nuclear membrane, and this tethering of the  
330 *de novo* telomere may cause large-scale rearrangement of chromosomes. As our method allows  
331 the generation of *de novo* telomere ends at any genomic loci, it is possible to alter spatial  
332 arrangement of chromosomes specifically at locus of interest. For example, the spatial  
333 arrangement of heterochromatic regions, where infected RBC-surface antigens and the sex-  
334 specific transcription factor *ap2-gare* located, may be altered by our method, which may allow us  
335 for investigating mechanisms of host immune evasion and sexual development of parasites.

336 Therefore, our method will assist for further understanding of parasite's life cycle from the view  
337 of spatial arrangement of chromosomes.

338 The normal mitotic division of split-Ch1-S parasites in RBCs indicated that *de novo*  
339 centromere functioned properly: it acted as the specific genomic site for assembling kinetochores  
340 which is the protein complex to direct chromosome movement along spindle microtubule[18].  
341 The formation of kinetochore requires a centromere-specific histone H3, called CENP-A[19].  
342 Thus, the CENP-A must be loaded specifically on the *de novo* centromere of the split chromosome  
343 and maintained epigenetically. This specific loading of CEMP-A highly depends on the sequence  
344 of centromere. Since the linear donor template containing centromere was nucleosome-free DNA  
345 fragment, there is no factors other than the sequence. This unique sequence dependency of CENP-  
346 A loading of *Plasmodium* parasite is considered to be one of the factors for successful splitting of  
347 the chromosome. Our Southern blotting analyses of split-Ch1-S and -L showed that *de novo*  
348 telomeres were elongated by telomerase and their length was regulated constantly. These results  
349 indicated that *de novo* telomeres were recognized by not only telomerase, but also other telomere  
350 binding proteins[20,21], similar to the original telomere. This recognition by telomere-associated  
351 molecules allowed the introduced telomeric sequences to function normally, protecting the ends  
352 of the split chromosomes and contributing to their stability in transgenic parasites. Therefore, we  
353 consider that this could be another factor for splitting chromosomes.

354 In conclusion, we demonstrated that the chromosome could be split by CRISPR/Cas9 system  
355 using telomere and centromere. In contrast to this method, there is a method for the fusion of  
356 chromosome ends using CRISPR/Cas9 system: all chromosomes were fused in *Saccharomyces*  
357 *cerevisiae*, which generated one or two chromosomes encoding all genes. Theoretically, a similar  
358 method could be developed in *P. berghei*. Combining these splitting/fusing methods, the  
359 chromosomes will be rearranged in large-scale which will provide us a strong tool for  
360 investigating the role of the spatial arrangement of chromosomes in gene expression.

361

362

## 363 **Acknowledgements**

364 We thank Mr. Takashi Sekine and Dr. Rie Kubota for technical support with Southern  
365 hybridization analysis. We are also grateful to Dr. Ryoichi Saito for equipment support with  
366 CHEF electrophoresis analysis.

367

## 368 **References**

- 369 1. Painter HJ, Campbell TL, Llinás M. The Apicomplexan AP2 family: Integral factors  
370 regulating Plasmodium development. *Molecular and Biochemical Parasitology*.  
371 2011;176: 1–7. doi:10.1016/j.molbiopara.2010.11.014
- 372 2. Hollin T, Le Roch KG. From Genes to Transcripts, a Tightly Regulated Journey in  
373 Plasmodium. *Frontiers in Cellular and Infection Microbiology*. 2020;10: 1–13.  
374 doi:10.3389/fcimb.2020.618454
- 375 3. Abel S, Le Roch KG. The role of epigenetics and chromatin structure in transcriptional  
376 regulation in malaria parasites. *Briefings in Functional Genomics*. 2019;18: 302–313.  
377 doi:10.1093/bfgp/elz005
- 378 4. Ay F, Bunnik EM, Varoquaux N, Bol SM, Prudhomme J, Vert JP, et al. Three-  
379 dimensional modeling of the *P. falciparum* genome during the erythrocytic cycle reveals  
380 a strong connection between genome architecture and gene expression. *Genome*  
381 *Research*. 2014;24: 974–988. doi:10.1101/gr.169417.113
- 382 5. Bunnik EM, Cook KB, Varoquaux N, Batugedara G, Prudhomme J, Cort A, et al.  
383 Changes in genome organization of parasite-specific gene families during the



- 384 Plasmodium transmission stages. Nature Communications. 2018;9.  
385 doi:10.1038/s41467-018-04295-5
- 386 6. Duraisingh MT, Voss TS, Marty AJ, Duffy MF, Good RT, Thompson JK, et al.  
387 Heterochromatin silencing and locus repositioning linked to regulation of virulence  
388 genes in Plasmodium falciparum. Cell. 2005;121: 13–24.  
389 doi:10.1016/j.cell.2005.01.036
- 390 7. Freitas LH, Hernandez-Rivas R, Ralph SA, Montiel-Condado D, Ruvalcaba-Salazar  
391 OK, Rojas-Meza AP, et al. Telomeric heterochromatin propagation and histone  
392 acetylation control mutually exclusive expression of antigenic variation genes in  
393 malaria parasites. Cell. 2005;121: 25–36. doi:10.1016/j.cell.2005.01.037
- 394 8. Lopez-Rubio JJ, Mancio-Silva L, Scherf A. Genome-wide Analysis of Heterochromatin  
395 Associates Clonally Variant Gene Regulation with Perinuclear Repressive Centers in  
396 Malaria Parasites. Cell Host and Microbe. 2009;5: 179–190.  
397 doi:10.1016/j.chom.2008.12.012
- 398 9. Lee MCS, Lindner SE, Lopez-Rubio JJ, Llinás M. Cutting back malaria: CRISPR/Cas9  
399 genome editing of Plasmodium. Briefings in Functional Genomics. 2019;18: 281–289.  
400 doi:10.1093/bfpg/elz012
- 401 10. Shinzawa N, Nishi T, Hiyoshi F, Motooka D, Yuda M, Iwanaga S. Improvement of  
402 CRISPR/Cas9 system by transfecting Cas9-expressing Plasmodium berghei with linear  
403 donor template. Communications Biology. 2020;3: 1–13. doi:10.1038/s42003-020-  
404 01138-2
- 405 11. Janse CJ, Ramesar J, Waters AP. High-efficiency transfection and drug selection of  
406 genetically transformed blood stages of the rodent malaria parasite Plasmodium  
407 berghei. Nature Protocols. 2006;1: 346–356. doi:10.1038/nprot.2006.53

- 408 12. Iwanaga S, Kaneko I, Yuda M. A high-coverage artificial chromosome library for the  
409 genome-wide screening of drug-resistance genes in malaria parasites. *Genome*  
410 *Research*. 2012;22. doi:10.1101/gr.124164.111
- 411 13. Shinzawa N, Ishino T, Tachibana M, Tsuboi T, Torii M. Phenotypic Dissection of a  
412 Plasmodium-Refractory Strain of Malaria Vector *Anopheles stephensi*: The Reduced  
413 Susceptibility to *P. berghei* and *P. yoelii*. *PLoS ONE*. 2013;8.  
414 doi:10.1371/journal.pone.0063753
- 415 14. Ponzi M, Pace T, Dore E, Frontali C. Identification of a telomeric DNA sequence in  
416 *Plasmodium berghei*. *The EMBO journal*. 1985;4: 2991–2995. doi:10.1002/j.1460-  
417 2075.1985.tb04034.x
- 418 15. Bushell E, Gomes AR, Sanderson T, Anar B, Girling G, Herd C, et al. Functional  
419 Profiling of a *Plasmodium* Genome Reveals an Abundance of Essential Genes. *Cell*.  
420 2017;170: 260-272.e8. doi:10.1016/j.cell.2017.06.030
- 421 16. Ellis McKenzie F, Ferreira MU, Kevin Baird J, Snounou G, Bossert WH. Meiotic  
422 recombination, cross-reactivity, and persistence in *Plasmodium falciparum*. *Evolution*.  
423 2001;55: 1299–1307. doi:10.1111/j.0014-3820.2001.tb00652.x
- 424 17. Figueiredo LM, Freitas-Junior LH, Bottius E, Olivo-Marin JC, Scherf A. A central role  
425 for *Plasmodium falciparum* subtelomeric regions in spatial positioning and telomere  
426 length regulation. *EMBO Journal*. 2002;21: 815–824. doi:10.1093/emboj/21.4.815
- 427 18. Gerald N, Mahajan B, Kumar S. Mitosis in the human malaria parasite *Plasmodium*  
428 *falciparum*. *Eukaryotic Cell*. 2011;10: 474–482. doi:10.1128/EC.00314-10
- 429 19. Hoeijmakers WAM, Flueck C, François KJ, Smits AH, Wetzel J, Volz JC, et al.  
430 *Plasmodium falciparum* centromeres display a unique epigenetic makeup and cluster

- 431 prior to and during schizogony. *Cellular Microbiology*. 2012;14: 1391–1401.  
432 doi:10.1111/j.1462-5822.2012.01803.x
- 433 20. Bertschi NL, Toenhake CG, Zou A, Niederwieser I, Henderson R, Moes S, et al.  
434 Malaria parasites possess a telomere repeat-binding protein that shares ancestry with  
435 transcription factor IIIA. *Nature Microbiology*. 2017;2: 1–12.  
436 doi:10.1038/nmicrobiol.2017.33
- 437 21. Gurung P, Gomes AR, Martins RM, Juraneck SA, Alberti P, Mbang-Benet DE, et al.  
438 PfGBP2 is a novel G-quadruplex binding protein in *Plasmodium falciparum*. *Cellular*  
439 *Microbiology*. 2021;23. doi:10.1111/cmi.13303

440

## 441 **Supporting information**

- 442 S1 Table. Oligonucleotides used in this study. (XLSX)  
443 S2 Fig. Maps of donor plasmids constructed for the chromosome split experiment. (TIFF)  
444 S3 Fig. Illustrations of split chromosome 1 and de novo telomere end of split site. (TIFF)  
445 S4 Fig. CRISPR/Cas9-based chromosome split in the split-Ch1-L parasites. (TIFF)  
446  
447  
448

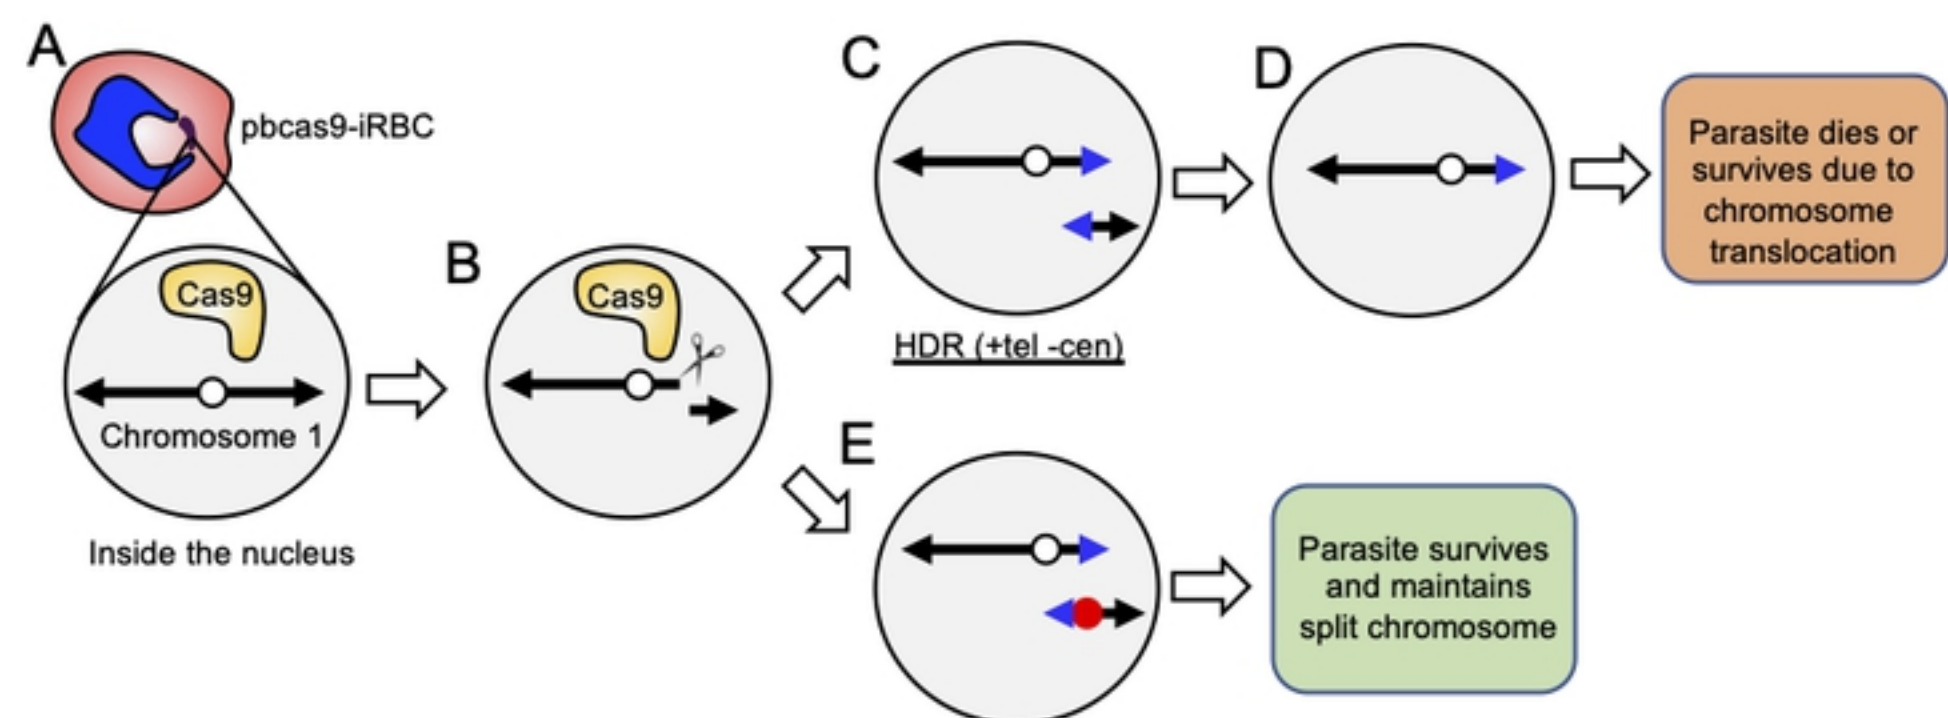

bioRxiv preprint doi: <https://doi.org/10.1101/2021.11.04.467339>; this version posted November 4, 2021. The copyright holder for this preprint (which was not certified by peer review) is the author/funder, who has granted bioRxiv a license to display the preprint in perpetuity. It is made available under aCC-BY 4.0 International license.

Figure 1

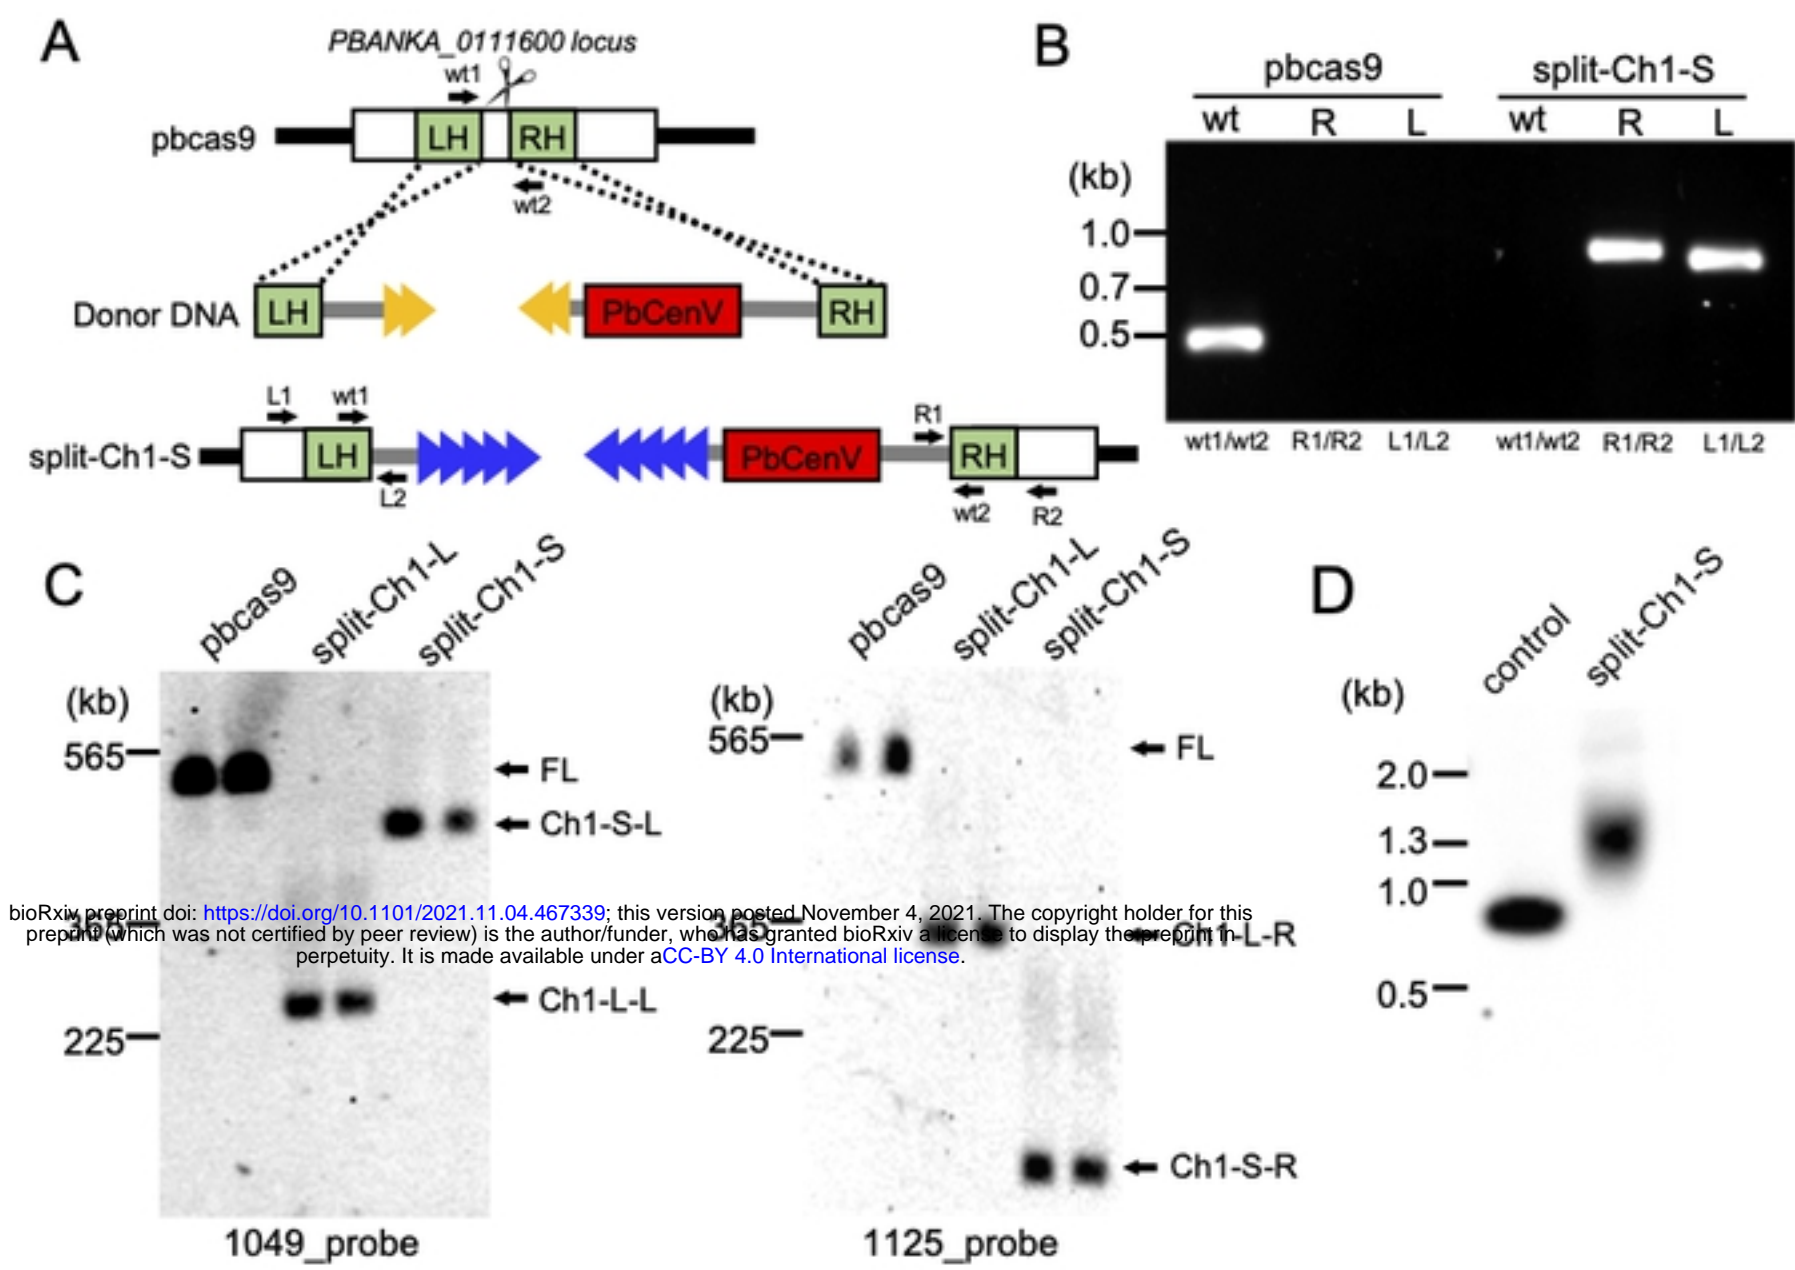

Figure 2

bioRxiv preprint doi: <https://doi.org/10.1101/2021.11.04.467339>; this version posted November 4, 2021. The copyright holder for this preprint (which was not certified by peer review) is the author/funder, who has granted bioRxiv a license to display the preprint in perpetuity. It is made available under aCC-BY 4.0 International license.

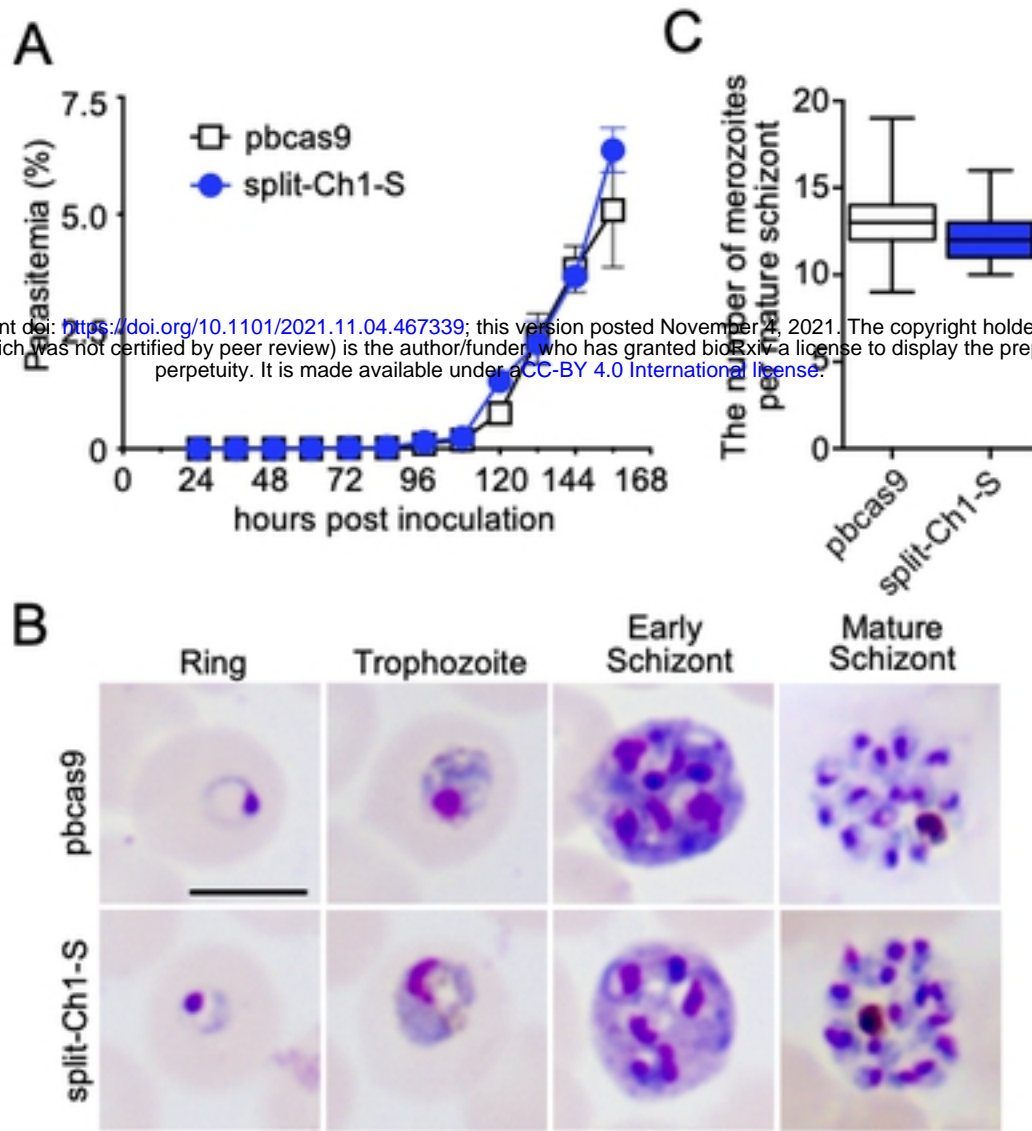

Figure 3

bioRxiv preprint doi: <https://doi.org/10.1101/2021.11.04.467339>; this version posted November 4, 2021. The copyright holder for this preprint (which was not certified by peer review) is the author/funder, who has granted bioRxiv a license to display the preprint in perpetuity. It is made available under aCC-BY 4.0 International license.

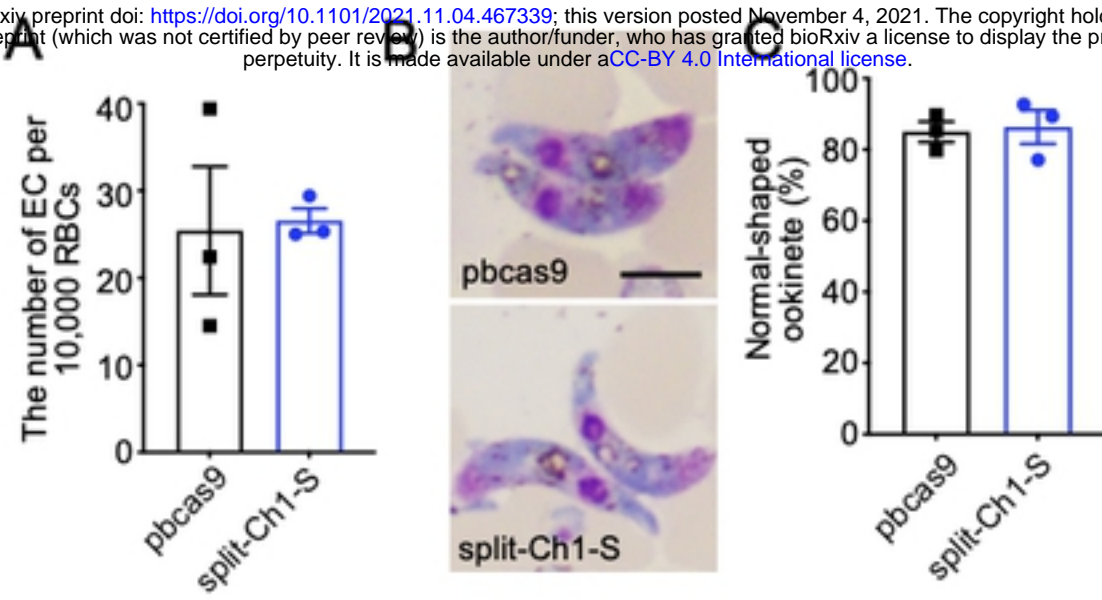

Figure 4
